# Supplementary material for: A novel enzyme-mediated gold nanoparticle synthesis and its application forin situdetection of horseradish peroxidase inhibitor phenylhydrazine
Source: Royal Society of Chemistry journal article supplement (doi:10.1039/c7nj03783j), 2017-01-01

***Supplementary Information***

***on***

A novel enzyme-mediated gold nanoparticle synthesis and its application for *in situ*  
detection of horseradish peroxidase inhibitor phenylhydrazine

Abhinav Parashar\*, Prachi Sachin Kedare\*, Sruthi Ann Alex, N. Chandrasekaran, Amitava  
Mukherjee†

Centre for Nanobiotechnology, VIT University, Vellore, India

\* Authors with equal contribution

† Corresponding author  
Dr. Amitava Mukherjee  
Sr. Professor & Deputy Director  
Centre for Nanobiotechnology  
VIT University  
Vellore-632014  
Phone No: 91-416-2202620  
Email: [amit.mookerjea@gmail.com](mailto:amit.mookerjea@gmail.com), [amitav@vit.ac.in](mailto:amitav@vit.ac.in)

**Fig. S1:** Digital image of visual color change with increasing concentrations of sodium borohydride added to aurochloric acid taken after 15 minutes of interaction time.

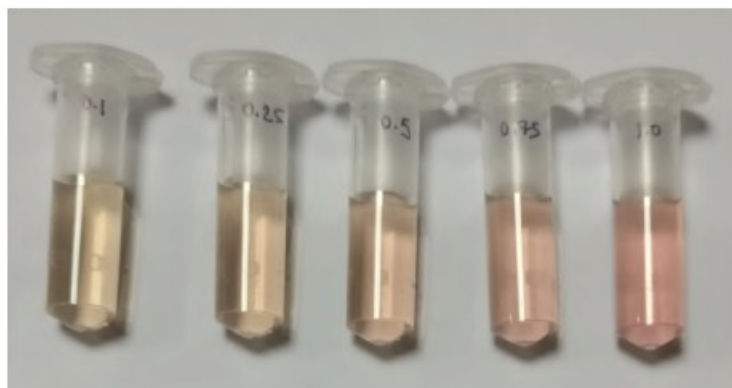

**Fig. S2:** Digital image of visual color change with increasing concentrations of hydrogen peroxide added to the GNP seed solution taken after 10 min of interaction time.

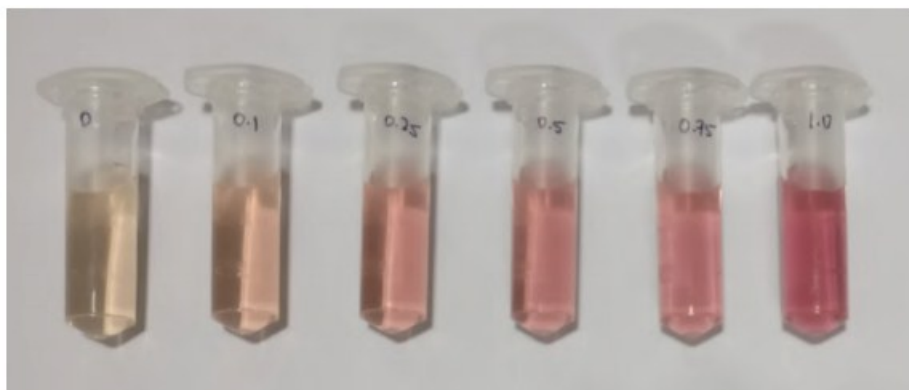

**Fig. S3:** Comparative study of the rate of formation of gold nanoparticles in the presence of varying concentrations of phenylhydrazine (normalized graph)

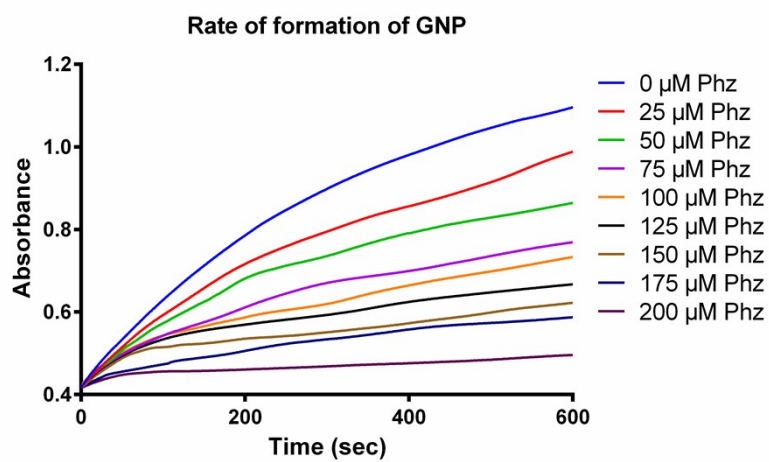

Supplement: c7nj03783j1.pdf [file c7nj03783j1.pdf]
